# Supplementary material
Source: PubMed Central journal article supplement (PMC3513970)

# SI Figure 4

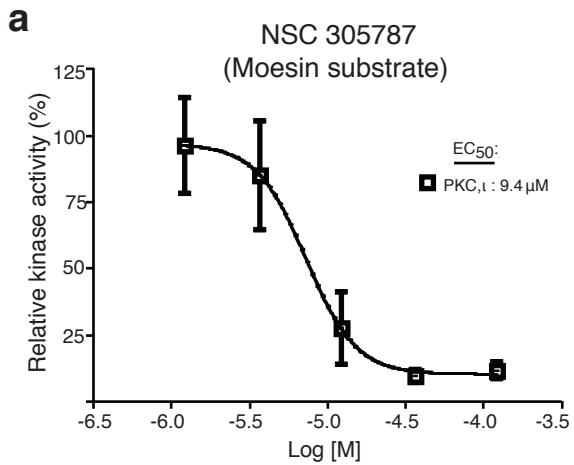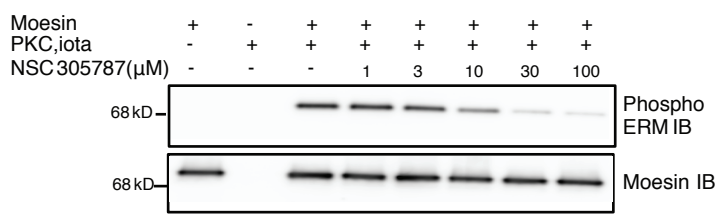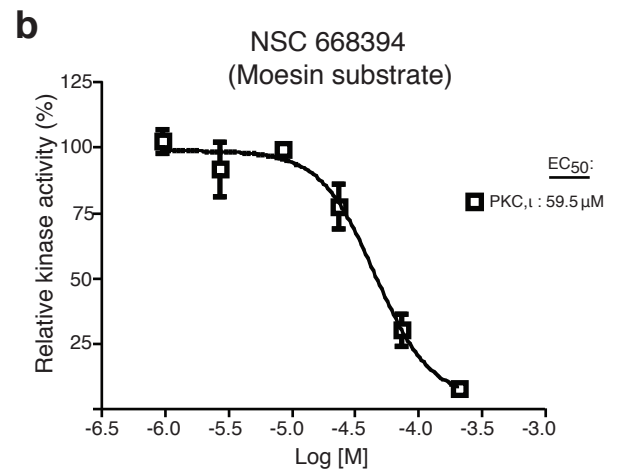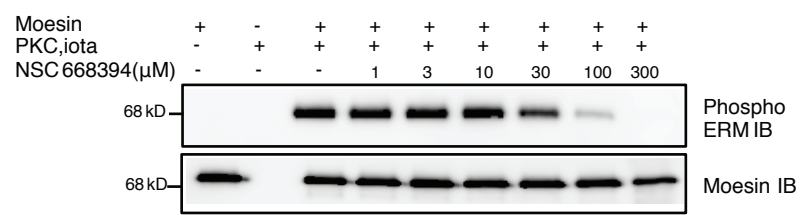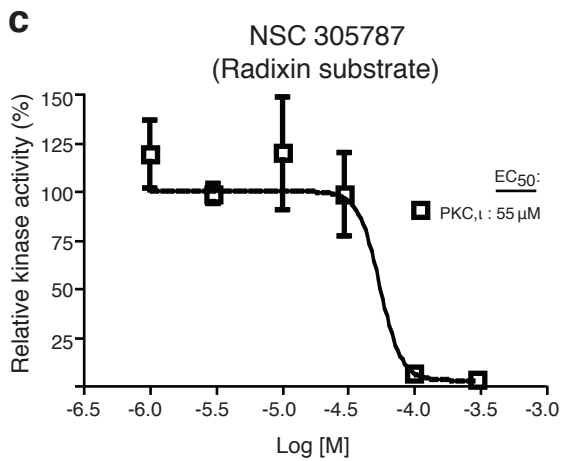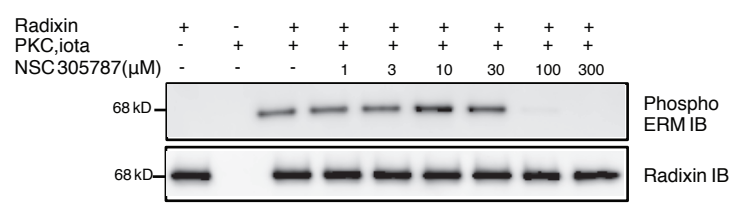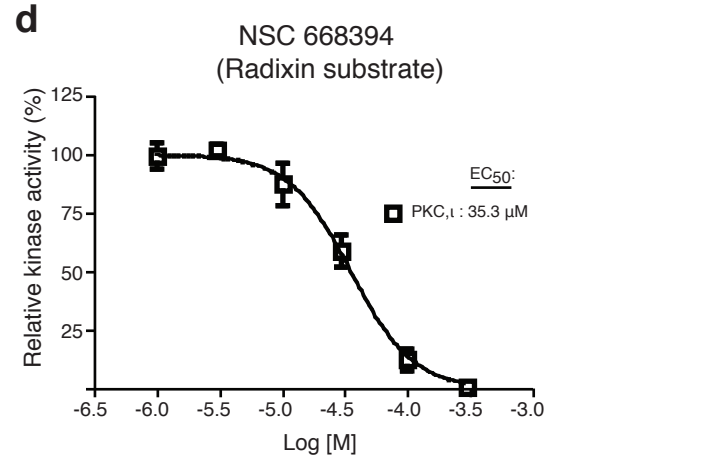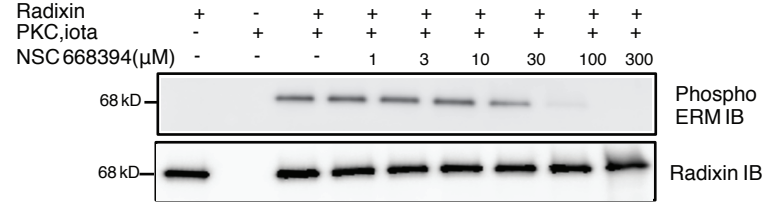

Supplement: NIHMS420325-supplement-Supplementary_Figure_4.pdf [file NIHMS420325-supplement-Supplementary_Figure_4.pdf]

SI Figure 5

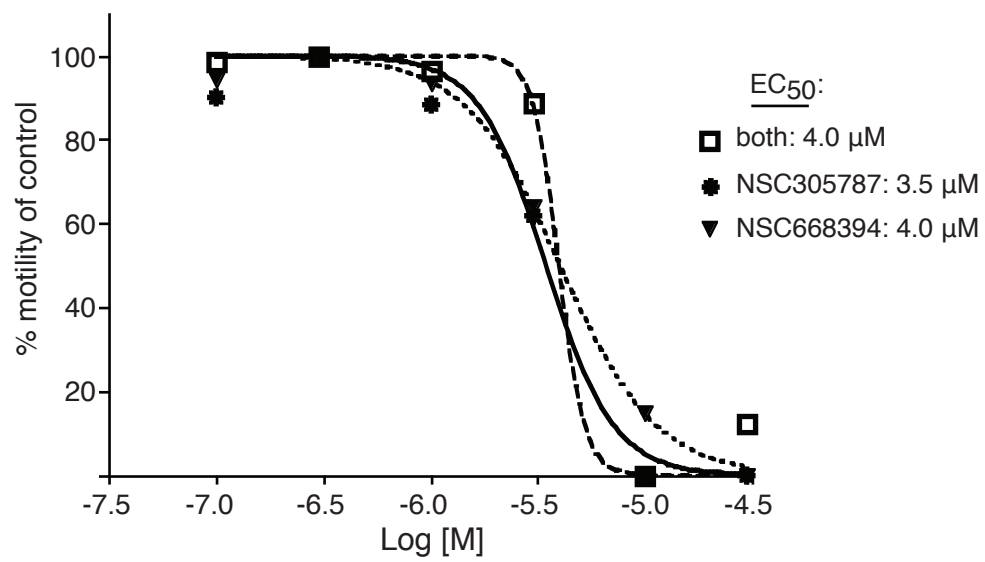

Supplement: NIHMS420325-supplement-Supplementary_Figure_5.pdf [file NIHMS420325-supplement-Supplementary_Figure_5.pdf]
